# Supplementary material for: Carbamazepine promotes surface expression of mutant Kir6.2-A28V ATP-sensitive potassium channels by modulating Golgi retention and autophagy
Source: PubMed Central journal article supplement (PMC9065613; doi:10.1016/j.jbc.2022.101904), 2022-04-06
Supplement: mmc1.pdf [file mmc1.pdf]

## qPCR analysis

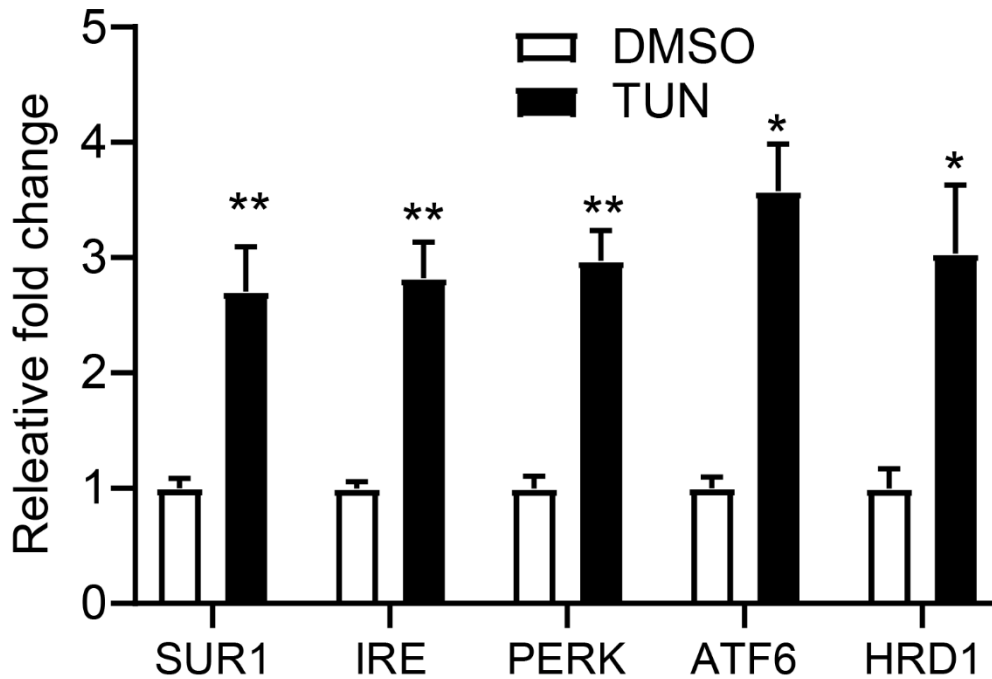

## Suppl Fig. 1

**Suppl Fig. 1 Tunicamycin activates UPR or ERAD.** Relative expression levels of SUR1 mRNA in INS-1 cells treated with tunicamycin (1.25  $\mu\text{g}/\text{mL}$ ) for 12h. The relative expression of SUR1, key UPR sensors (i.e., IRE1, PERK, ATF6) and ERAD sensor, Hrd1, were increased as compared to DMSO treated INS-1 cells. Data are presented as the mean  $\pm$  SEM; n = 6 per group; no results achieved significance when compared with DMSO-treated cells in each corresponding group; differences were evaluated using two-way ANOVA and Dunnett's post hoc test.
